# Supplementary material for: Facile, fast and green synthesis of a highly porous calcium-syringate bioMOF with intriguing triple bioactivity
Source: Royal Society of Chemistry journal article supplement (doi:10.1039/d2qi02639b), 2023-01-01
Supplement: d2qi02639b1.pdf [file d2qi02639b1.pdf]

## **Additional footnote**

This work is dedicated to the memory of Blanca Vázquez-Lasa, who was a long-term collaborator of many of the authors. We feel grateful for having had the chance to interact with Blanca, a woman of great insight and sweetness. Though she did not witness the publication of this article, she motivated much of the work presented here, and accompanied it for as long as her health permitted. Both as scientists and as personal acquaintances, we miss Blanca greatly, and we would like to express our condolences to his family and friends.
